# Supplementary material
Source: publisher figshare collection journal article supplement (https://geolsoc.figshare.com/ndownloader/files/5426831)
Supplement: Supplementary file 1 [file 5426831]

	Isotope Ratio							Age (Ma)
04-6-11 Zircon Number	206Pb/238U	err (2s)	207Pb/235U	err (2s)	207Pb/206Pb	err (2s)		206Pb/238U	2s	207Pb/235U	2s	207Pb/206Pb	2s	Discordance	Rho
20.1	0.1047	0.0011	0.88	0.01	0.0609	0.0009		642	6	641	7	637	32	-1%	0.3040
19.1	0.1086	0.0011	0.92	0.01	0.0613	0.0011		664	7	661	8	648	38	-3%	0.1352
18.2	0.1045	0.0011	0.90	0.01	0.0628	0.0011		641	6	654	7	700	36	9%	0.1684
18.1	0.1051	0.0011	0.88	0.01	0.0609	0.0010		644	6	643	7	637	34	-1%	0.2659
17.1	0.1052	0.0013	0.92	0.01	0.0631	0.0010		645	7	660	8	712	35	9%	0.3450
9.1	0.1045	0.0033	0.86	0.04	0.0594	0.0021		641	19	628	22	581	76	-10%	0.6655
5.1	0.0974	0.0040	0.80	0.04	0.0594	0.0023		599	23	596	25	582	84	-3%	0.7123
11.1	0.1080	0.0033	0.90	0.04	0.0603	0.0020		661	19	650	22	614	71	-8%	0.6856
6.1	0.1027	0.0035	0.86	0.04	0.0605	0.0023		630	20	628	23	621	81	-2%	0.6587
8.1	0.1105	0.0029	0.92	0.04	0.0605	0.0020		676	17	664	21	622	72	-9%	0.6297
6.1	0.1064	0.0034	0.89	0.04	0.0607	0.0022		652	20	647	23	630	78	-3%	0.6491
1.1	0.1066	0.0031	0.90	0.04	0.0615	0.0021		653	18	654	22	657	72	1%	0.6543
7.1	0.1015	0.0023	0.86	0.03	0.0616	0.0016		623	13	631	14	659	55	5%	0.5520
7.2	0.1126	0.0025	0.96	0.03	0.0616	0.0015		688	14	682	14	662	52	-4%	0.5728
12.1	0.1069	0.0032	0.91	0.04	0.0619	0.0022		655	18	658	22	670	75	2%	0.6348
3.1	0.1074	0.0033	0.93	0.04	0.0626	0.0023		658	19	666	23	695	76	5%	0.6425
